# Supplementary material for: Genetic Variability and Aggressiveness of Tilletia indica Isolates Causing Karnal Bunt in Wheat
Source: MDPI journal article supplement (doi:10.3390/jof8030219), 2022-02-23
Supplement: s1 [file s1]

Table S1 List of RAPID Primers used for the molecular characterization of *T. indica*

| Sr. No. | RAPD     | Primer        | Product size | Annealing temperatures C° | Reference                    |
|---------|----------|---------------|--------------|---------------------------|------------------------------|
| 1       | RAPID 16 | GTG AGG CGT C | 2.5-1.6 Kb   | 38                        | Gupta <i>et al.</i> , 2015   |
| 2       | OPA2     | TGCCGAGCTG    | 0.3-1.1 Kb   | 36                        |                              |
| 3       | OPA3     | AGTCAGCCAC    | 0.3-1.0 Kb   | 36                        |                              |
| 4       | OPA9     | GGGTAACGCC    | 0.5-2.0 Kb   | 36                        |                              |
| 5       | OPA13    | CAGCACCCAC    | 0.3-1.25 Kb  | 38                        |                              |
| 6       | OPA18    | AGGTGACCGT    | 0.6-3.0 Kb   | 38                        |                              |
| 7       | OPA20    | GTTGCGATCC    | 0.5-3.0 Kb   | 38                        |                              |
| 8       | OPAA1    | AGACGGCTCC    | 0.4-2.0 Kb   | 36                        |                              |
| 9       | OPAA16   | GGAACCCACA    | 0.3-3.0 Kb   | 38                        |                              |
| 10      | OPAA3    | TTAGCGCCCC    | 0.5-3.5 Kb   | 36                        | Parveen <i>et al.</i> , 2013 |
| 11      | OPAA4    | AGGACTGCTC    | 0.2-2.0 Kb   | 36                        |                              |
| 12      | OPAA7    | CTACGCTCAC    | 0.1-2.5 Kb   | 42                        |                              |
| 13      | OPAA11   | ACCCGACCTG    | 0.2-2.0 Kb   | 36                        |                              |
| 14      | OPAA13   | GAGCGTCGCT    | 0.5-3.0 Kb   | 38                        |                              |
| 15      | OPAA15   | ACGGAAGCCC    | 0.2-3.5 Kb   | 36                        |                              |
| 16      | OPAA17   | GAGCCCGACT    | 0.2-2.0 Kb   | 36                        |                              |
| 17      | OPAA18   | TGGTCCAGCC    | 0.4-2.0 Kb   | 36                        |                              |
| 18      | OPAA9    | AGATGGGCAG    | 0.3-2.0 Kb   | 36                        |                              |
| 19      | OPAA10   | TGGTCGGGTG    | 0.2-1.5 Kb   | 36                        |                              |
| 20      | OPAD10   | AAGAGGCCAG    | 0.5-0.9 Kb   | 38                        |                              |
| 21      | OPAD12   | AAGAGGGCGT    | 0.3-1.5 Kb   | 38                        |                              |
| 22      | OPAD5    | ACCGCATGGG    | 0.2-2.0 Kb   | 38                        |                              |
| 23      | OPAD14   | GAACGAGGGT    | 0.3-2.0 Kb   | 38                        |                              |
| 24      | OPC14    | TGCGTGCTTG    | 0.4-3.0 Kb   | 38                        |                              |
| 25      | OPC8     | TGGACCGGTG    | 0.7-1.5 Kb   | 36                        |                              |
| 26      | OPC15    | GACGGATCAG    | 0.4-3.0 Kb   | 36                        |                              |
| 27      | OPB6     | TGCTCTGCCC    | 0.3-3.0 Kb   | 36                        |                              |

|    |       |            |            |    |
|----|-------|------------|------------|----|
| 28 | OPB8  | GTCCACACGG | 0.5-3.0 Kb | 36 |
| 29 | OPD2  | GGACCCAACC | 0.5-3.0 Kb | 36 |
| 30 | OPD7  | TTGGCACGGG | 0.4-3.0 Kb | 36 |
| 31 | OPD16 | AGGGCGTAAG | 0.4-3.0 Kb | 36 |

Table S2 List of ISSR Primers used for the molecular characterization of *T. indica*

| Sr. No. | ISSR UBC | Primer                                    | Product size KB | Annealing Temp. C° | Reference                    |
|---------|----------|-------------------------------------------|-----------------|--------------------|------------------------------|
| 1       | 826      | (AC)8C<br>5'ACACACACACACACACC3'           | 0.3-1.2         | 54                 | Parveen <i>et al.</i> , 2013 |
| 2       | 808      | (AG)8C<br>5'AGAGAGAGAGAGAGAGC3'           | 0.3-0.7         | 54                 |                              |
| 3       | 811      | (GA)8C<br>5'GAGAGAGAGAGAGAGAC3'           | 0.3-1.2         | 54                 |                              |
| 4       | 834      | (AG)(8)T<br>5'AGAGAGAGAGAGAGAGT3'         | 0.3-0.75        | 50                 |                              |
| 5       | 810      | (GA)8T<br>5'GAGAGAGAGAGAGAGAT3'           | 0.15-1.1        | 50                 |                              |
| 6       | 841      | (GA)8YC<br>5'GAGAGAGAGAGAGAGAYC3'         | 0.15-1.1        | 58                 |                              |
| 7       | 835      | (AG)8YC<br>5'AGAGAGAGAGAGAGAGYC3'         | 0.3-0.7         | 54                 |                              |
| 8       | 809      | (AG)(8)G<br>5'AGAGAGAGAGAGAGAGG3'         | 0.3-1.0         | 54                 |                              |
| 9       | 842      | (GA)8YG<br>5'GAGAGAGAGAGAGAGAYG3'         | 0.2-2.0         | 58                 |                              |
| 10      | 818      | HBH(AG)7<br>5'HBHAGAGAGAGAGAGAG3'         | 0.35-1.5        | 50                 |                              |
| 11      | 817      | (CA)8A<br>5'CACACACACACACAA3'             | 0.25-1.2        | 50                 |                              |
| 12      | 812      | (GA)(8)A<br>5'GAGAGAGAGAGAGAGAA3'         | 0.5-2.5         | 50                 |                              |
| 13      | 820      | (GT)8C<br>5'GTGTGTGTGTGTGTGTC3'           | 0.7-3.5         | 54                 |                              |
| 14      | 824      | (TC)8G<br>5'TCTCTCTCTCTCTCG3'             | 0.3-2.5         | 54                 |                              |
| 15      | 845      | (CT)8RG<br>5'CTCTCTCTCTCTCTTRG3'          | 0.3-1.1         | 52                 |                              |
| 16      | 857      | (AC)(8)YG<br>5'ACACACACACACACACYG3'       | 0.5-0.7         | 52                 |                              |
| 17      | 864      | (ATG)6<br>5'ATGATGATGATGATGATG3'          | 0.3-2.5         | 54                 |                              |
| 18      | 873      | (GACA)4<br>5'GAC AGA CAGACA GACA3'        | 0.3-0.7         | 54                 |                              |
| 19      | 876      | (GATA)2(GACA)2<br>5'GAT AGA TAGACA GACA3' | 0.25-1.0        | 52                 |                              |
| 20      | 880      | (GGAGA)3<br>5'GGA GAGGAG AGGAGA3'         | 0.4-3.0         | 52                 |                              |
| 21      | 881      | (GGGTG)(3)<br>5'GGG TGGGGT GGGGTG3'       | 0.2-0.7         | 58                 |                              |

|       |              |                                                 |          |    |                            |
|-------|--------------|-------------------------------------------------|----------|----|----------------------------|
| 22    | 890          | VHV(GT)7<br>5'VHV GTGTGT GTGTGT GT3'            | 0.25-1.5 | 52 |                            |
| 23    | 840          | (GA)(8)YT<br>5'GAGAGA GAGAGA GAGAYT3'           | 0.3-2.5  | 58 |                            |
| 24    | 815          | (CT)8G<br>5'CTCTCT CTCTCT CTCTG3'               | 0.3-3.0  | 52 |                            |
| 25    | 847          | (CA)8 A/G C<br>5'CAC ACA CAC ACA CAC AAC3'      | 0.3-1.0  | 54 |                            |
| 26    |              | (CA)8 A/G C<br>5'CAC ACA CAC ACA CAC AGC3'      | 0.3-3.0  | 56 |                            |
| 27    | 856<br>856-2 | (AC)8YA<br>5'ACA CAC ACA CAC ACA CYA3'          |          | 54 |                            |
| 28    | 844          | (CT)8RC<br>5'CTC TCT CTC TCT CTC TRC3'          | 0.3-3.0  | 54 |                            |
| <hr/> |              |                                                 |          |    |                            |
| 29    | 885          | BHB(GA)(7)<br>5'BHB GAG AGA GAG AGA GA3'        | 0.25-2.7 | 50 | Gupta <i>et al.</i> , 2015 |
| 30    | ISSR-18      | ((CTC)(8))<br>5'CTC CTCCTCCTCCTCCTCCTC<br>CTC3' | 500-1300 | 54 |                            |
| 31    | ISSR-17      | (ATG)6<br>5'ATG ATGATGATGATGATG3'               | 500-1400 | 56 |                            |
| 32    | ISSR-1       | (HVH(TG)(7))<br>5'HVH TGT GTG TGT GTG TG3'      | 200-1400 | 50 |                            |

B= C,G,T; D=A, G,T; H=A,C,T;R=A, G;V=A,CG;Y=C,T

Table S3. Disease reactions of eight wheat varieties to 49 isolates of *T. indica*.

| Isolates | WL-711 | HD-29 | Janbaz | Bakhtawar-92 | Fakhre-Sarhad | Tatara | NIFA-Barsat | AARI-2011 |
|----------|--------|-------|--------|--------------|---------------|--------|-------------|-----------|
| PB-41    | HR     | R     | HR     | HR           | R             | HR     | HR          | HR        |
| PB-42    | R      | R     | HR     | R            | HR            | HR     | HR          | HR        |
| PB-43    | HR     | HR    | HR     | HR           | HR            | HR     | HR          | HR        |
| PB-44    | HR     | R     | HR     | HR           | R             | R      | HR          | HR        |
| PB-45    | HR     | R     | HR     | HR           | HR            | HR     | HR          | HR        |
| PB-46    | R      | HR    | HR     | R            | R             | HR     | R           | HR        |
| PB-47    | R      | R     | R      | R            | R             | HR     | R           | HR        |
| PB-48    | HR     | HR    | HR     | HR           | HR            | HR     | HR          | R         |
| PB-49    | R      | HR    | HR     | R            | R             | R      | HR          | HR        |
| PB-50    | HR     | R     | HR     | HR           | R             | R      | HR          | HR        |
| PB-51    | R      | R     | R      | HR           | R             | HR     | HR          | HR        |
| PB-52    | R      | HR    | R      | HR           | R             | HR     | HR          | HR        |
| PB-53    | R      | HR    | HR     | R            | R             | R      | R           | HR        |
| PB-54    | R      | R     | R      | R            | R             | R      | HR          | HR        |

|        |    |    |    |    |    |    |    |    |
|--------|----|----|----|----|----|----|----|----|
| PB-55  | MS | HR | HR | R  | HR | R  | R  | R  |
| PB-56  | R  | HR | R  | R  | HR | HR | HR | R  |
| PB-59  | R  | HR | R  | HR | R  | HR | HR | HR |
| PB-60  | HR |
| PB-61  | R  | HR |
| PB-62  | HR | HR | HR | HR | R  | HR | HR | HR |
| PB-63  | R  | HR | R  | HR | R  | HR | R  | HR |
| PB-64  | HR | HR | HR | R  | R  | HR | HR | HR |
| PB-65  | R  | HR |
| PB-66  | HR | HR | HR | R  | HR | HR | HR | HR |
| PB-67  | R  | HR | HR | R  | R  | R  | HR | HR |
| PB-68  | HR |
| PB-69  | HR | HR | HR | R  | R  | HR | HR | HR |
| PB-70  | R  | R  | HR | R  | R  | HR | R  | HR |
| PB-71  | HR | HR | R  | HR | R  | HR | HR | HR |
| PB-72  | HR | HR | HR | HR | R  | R  | HR | R  |
| PB-73  | HR | HR | HR | HR | R  | HR | HR | HR |
| PB-74  | HR | R  | R  | HR | R  | HR | HR | HR |
| PB-75  | HR | HR | HR | HR | R  | R  | R  | HR |
| PB-76  | HR | HR | HR | HR | R  | R  | HR | R  |
| PB-77  | HR | R  | R  | HR | R  | R  | HR | HR |
| PB-78  | R  | HR | HR | HR | R  | HR | HR | HR |
| PB-79  | HR | HR | R  | HR | HR | HR | HR | R  |
| PB-80  | HR | R  | HR | HR | HR | HR | HR | HR |
| PB-82  | HR | HR | HR | HR | HR | HR | R  | HR |
| KPK-11 | R  | R  | HR | R  | HR | HR | HR | R  |
| KPK-12 | HR | HR | R  | R  | R  | HR | HR | HR |
| KPK-13 | HR | HR | HR | HR | HR | R  | HR | R  |
| KPK-14 | HR | R  | HR | HR | HR | HR | HR | HR |
| KPK-15 | R  | HR | R  | HR | HR | R  | R  | HR |
| KPK-16 | HR | HR | HR | R  | R  | HR | HR | R  |
| KPK-17 | R  | HR | HR | HR | HR | R  | R  | HR |
| KPK-18 | R  | HR | HR | HR | HR | HR | HR | R  |
| KPK-19 | R  | HR | R  | R  | HR | R  | R  | R  |
| PB-25  | MS | R  | R  | R  | MS | R  | R  | R  |

Table S4 Eigen value, explained variance and cumulative variance in the PCA using characters to classify 68 isolates by RAPD and ISSR

| Markers | PCA | Eigen value | Explained<br>variance | Cumulative<br>variance |
|---------|-----|-------------|-----------------------|------------------------|
| RAPD    | 1   | 1.6656      | 14.89                 | 14.89                  |
|         | 2   | 1.3043      | 9.128                 | 24.013                 |
|         | 3   | 1.10131     | 6.508                 | 30.521                 |
| ISSR    | 1   | 2.177       | 11.77                 | 11.77                  |
|         | 2   | 1.57865     | 6.192                 | 17.966                 |
|         | 3   | 1.45561     | 5.264                 | 23.23                  |

PCA: Principle component analysis

Table S5. Genetic structure of *Tilletia indica* isolates and estimates of gene flow within the genus

| Marker | HT      | Hs      | GST       | Gprime-st | D_het   | Nm      |
|--------|---------|---------|-----------|-----------|---------|---------|
| RAPD   | 0.20783 | 0.19671 | 0.0534883 | 0.12641   | 0.02768 | 8.84784 |
| ISSR   | 0.2308  | 0.21947 | 0.0491063 | 0.11994   | 0.02904 | 9.68199 |

: HT = Total diversity; HS = Diversity within population; D-het = Diversity between the population GST = coefficient of gene differentiation; G prime-st = Genetic differentiation according to Hedric (2005) Nm= gene flow based on GST
